# Supplementary material for: Designing Efficient Metal-Free Dye-Sensitized Solar Cells: A Detailed Computational Study
Source: MDPI journal article supplement (doi:10.3390/molecules28176177), 2023-08-22
Supplement: s1 [file s1]

## *Supporting information*

*Article*

# **Designing Efficient metal-free dyes Dye-Sensitized Solar Cells: a detailed computational study**

**F. M. Mustafa <sup>1</sup>, Ahmed A. Abdel Khalek <sup>1</sup>, Abdulla Azzam Mahboob <sup>2</sup>, and Mahmoud K. Abdel-Latif <sup>1,2</sup>**

<sup>1</sup>Chemistry Department, Faculty of Science, Beni-Suef University, Beni-Suef City, Egypt

<sup>2</sup>Chemistry Department, Collage of Science, United Arab Emirates University, Al-Ain, UAE

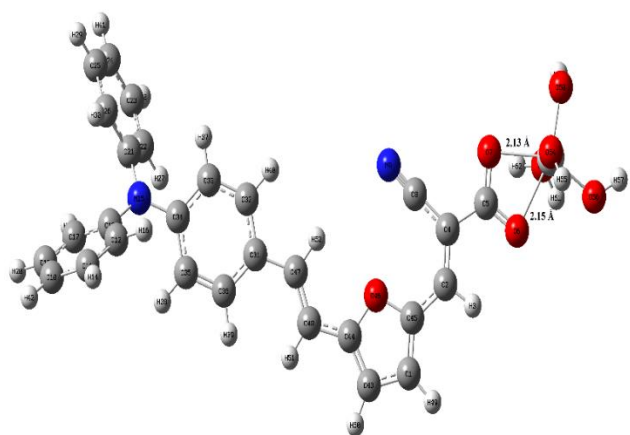

**A0**

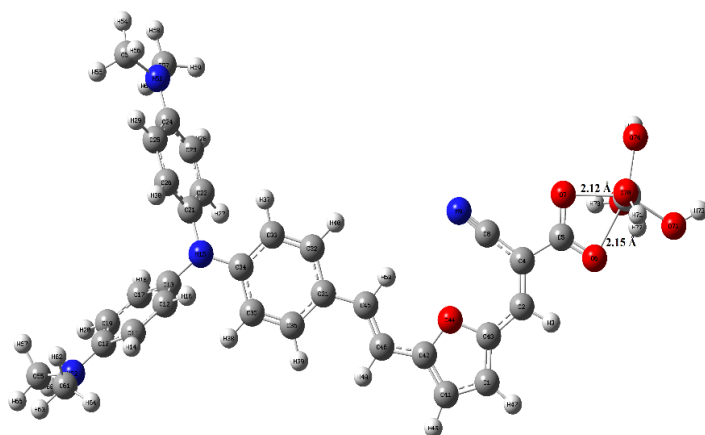

**A1**

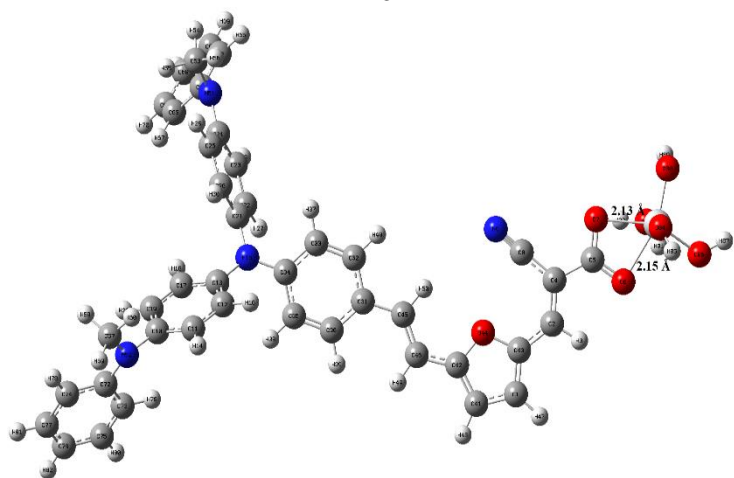

**A2**

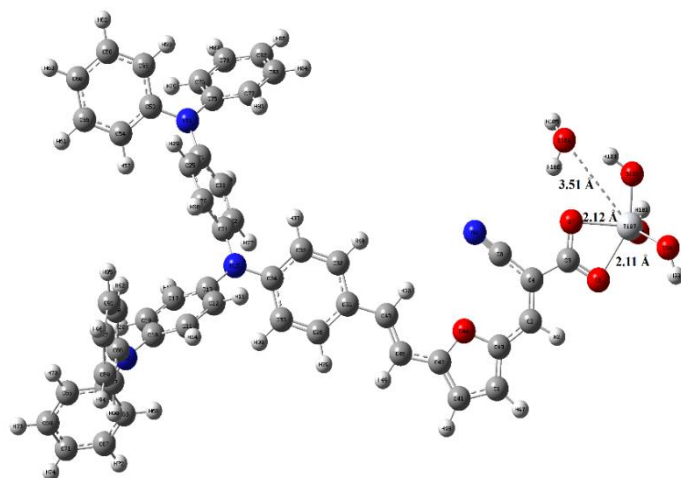

**A3**

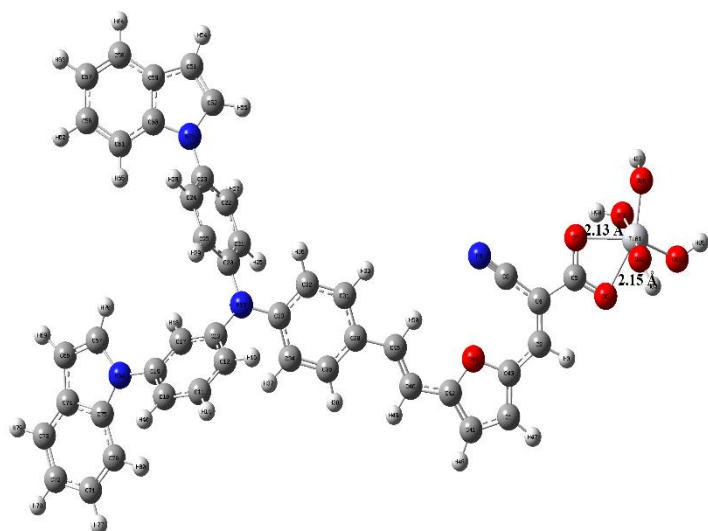

**A4**

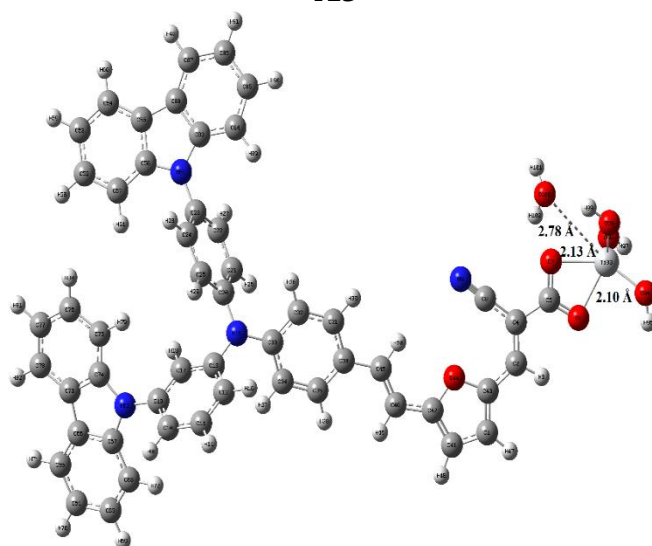

**A5**

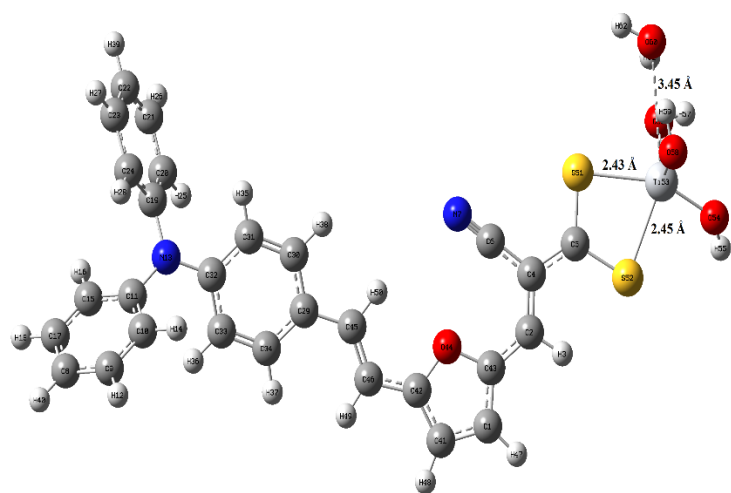

**B0**

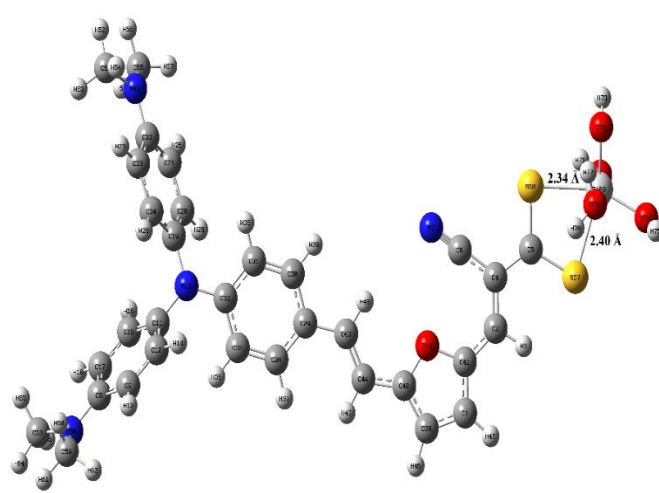

**B1**

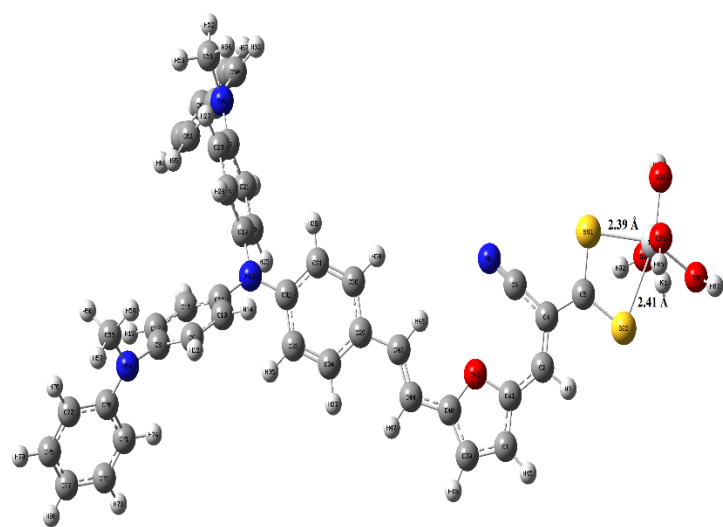

**B2**

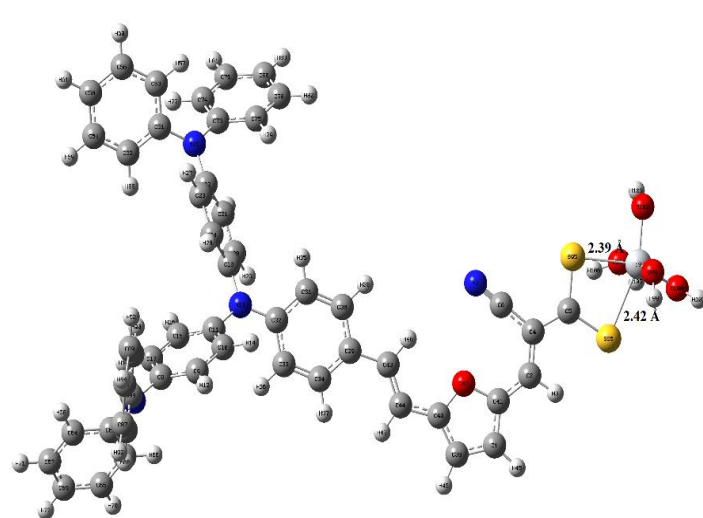

**B3**

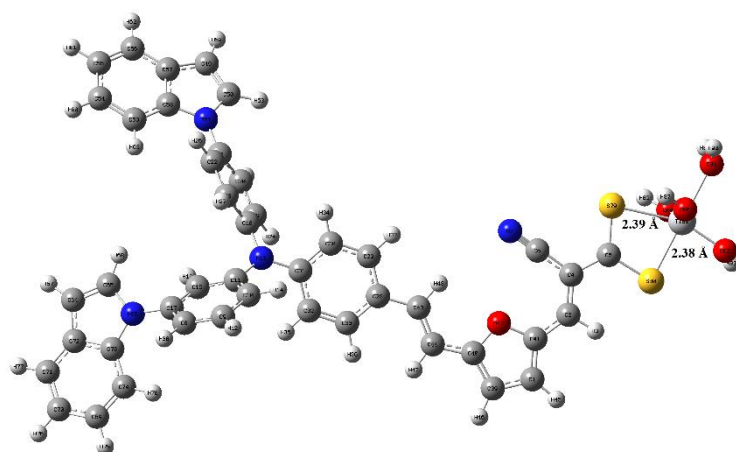

**B4**

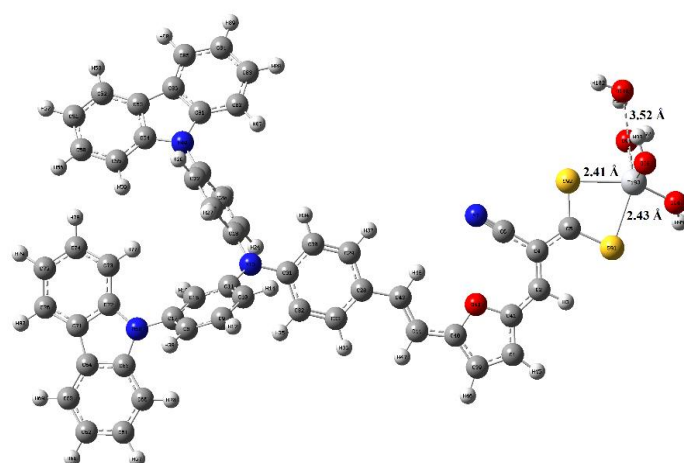

**B5**

Figure S1. The optimized geometry of all designed dyes attached with the  $\text{Ti}(\text{OH})_4$  surface.
